# Supplementary material for: Soft UV nanoimprint lithography-designed highly sensitive substrates for SERS detection
Source: Springer Nature journal article supplement (doi:10.1186/1556-276x-9-623), 2014-11-21
Supplement: 11671_2014_2361_MOESM1_ESM.pdf [file 11671_2014_2361_MOESM1_ESM.pdf]

PDMS Stamp fabrication &  
Stamp removal

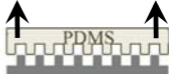

Imprint in AMONIL  
with UV light

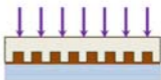

PDMS Stamp withdrawal

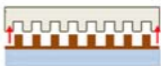

Residual thickness etching  
by RIE

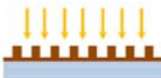

Cr/Au evaporation  
& lift-off

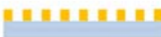

(a)

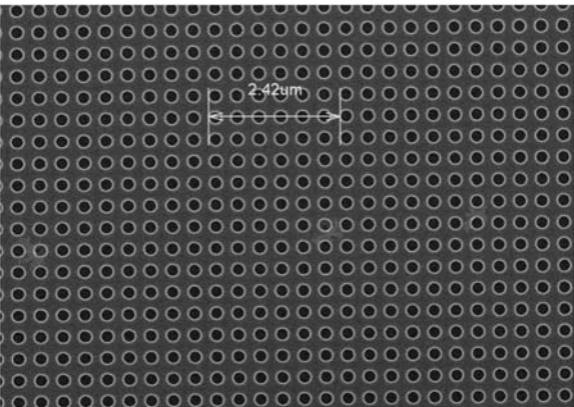

(b)
