# Supplementary material for: Soft UV nanoimprint lithography-designed highly sensitive substrates for SERS detection
Source: Springer Nature journal article supplement (doi:10.1186/1556-276x-9-623), 2014-11-21

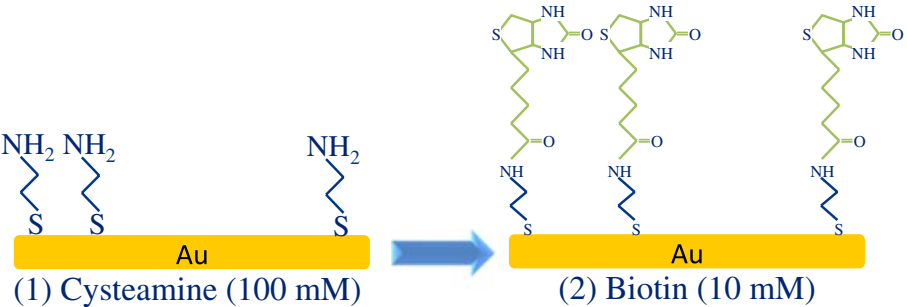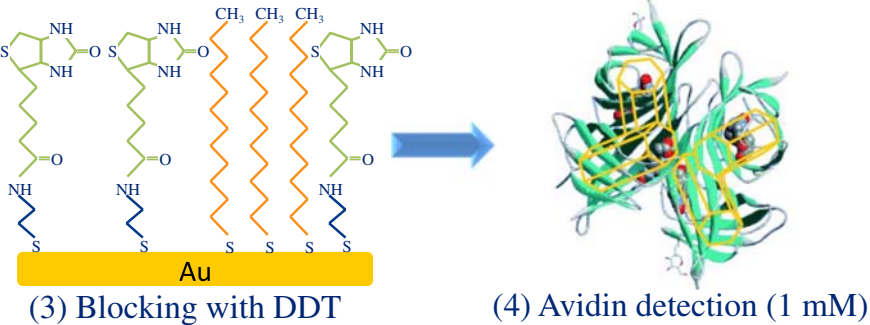

Supplement: 11671_2014_2361_MOESM2_ESM.pdf [file 11671_2014_2361_MOESM2_ESM.pdf]
